# Supplementary material for: A proteolytically activated antimicrobial toxin encoded on a mobile plasmid of Bacteroidales induces a protective response
Source: PubMed Central journal article supplement (PMC9308784; doi:10.1038/s41467-022-31925-w), 2022-07-23
Supplement: 41467_2022_31925_MOESM1_ESM.pdf [file 41467_2022_31925_MOESM1_ESM.pdf]

Supplementary Table 1. Comparison of proteins encoded by pBUN24 and pBCPT

| pBUN24       |                               |                    |       |       |       |     | % similarity | pBCPT (PvCL04 gene designations) |                                          |                    |       |       |       |     |
|--------------|-------------------------------|--------------------|-------|-------|-------|-----|--------------|----------------------------------|------------------------------------------|--------------------|-------|-------|-------|-----|
| gene name    | product                       | motifs             | start | stop  | bp    | aa  |              | gene name                        | predicted function                       | motifs             | start | stop  | bp    | aa  |
| repA         | repA                          | PF01051            | 476   | 1,453 | 978   | 325 | 92.62%       | CS034_04053                      | repA                                     | PF01051            | 475   | 1,452 | 978   | 325 |
| CDS_9 (orf2) | hypothetical protein          |                    | 1,467 | 1,649 | 183   | 60  | 96.36%       | CS034_04054                      | hypothetical protein                     |                    | 1,466 | 1,657 | 192   | 63  |
| CDS_8 (orf1) | hypothetical protein          |                    | 1,763 | 2,284 | 522   | 173 | 94.80%       | CS034_04055                      | hypothetical protein                     |                    | 1,759 | 2,280 | 522   | 173 |
| CDS_7 (orf7) | hypothetical protein          |                    | 2,314 | 2,855 | 542   | 180 |              | CS034_04056                      | LuxR-type DNA-binding HTH domain protein | PF00196            | 2,301 | 3,938 | 1,638 | 545 |
| CDS_6 (orf6) | HTH transcriptional regulator |                    | 2,878 | 3,975 | 1,098 | 365 |              | CS034_04057                      | predicted OMP                            |                    | 4,086 | 4,658 | 573   | 190 |
| CDS_5 (orf5) | putative lipoprotein          | PF08450            | 4,195 | 5,850 | 1,656 | 551 |              | CS034_04058                      | Bcpt (experimental evidence)             |                    | 4,672 | 6,171 | 1,500 | 499 |
|              |                               |                    |       |       |       |     |              | CS034_04059                      | Bcpl (experimental evidence)             |                    | 6,228 | 6,401 | 174   | 57  |
| mobB         | MobB                          |                    | 6,405 | 7,283 | 879   | 292 | 98.29%       | CS034_04060                      | MobB                                     | DUF5712, PF18976   | 6,579 | 7,457 | 879   | 292 |
| mobA         | MobA                          |                    | 7,280 | 7,885 | 606   | 201 | 99.50%       | CS034_04061                      | MobA                                     | PF01726            | 7,454 | 8,059 | 606   | 201 |
| CDS_4 (orf4) | hypothetical protein          |                    | 7,917 | 8,183 | 267   | 88  |              |                                  |                                          |                    |       |       |       |     |
| CDS_3 (tad)  | TA system toxin               | PF05973, TIGR03070 | 8,277 | 8,624 | 348   | 115 | 98.26%       | CS034_04062                      | HipB-like toxin                          | PF05973, TIGR03070 | 8,450 | 8,797 | 348   | 115 |
| CDS_2 (ata)  | TA system anti-toxin          | PF15731            | 8,630 | 8,944 | 315   | 104 | 100.00%      | CS034_04063                      | MqsA-like anti-toxin                     | PF15731            | 8,803 | 9,117 | 315   | 104 |
| CDS_1 (orf3) | hypothetical protein          |                    | 8,938 | 263   | 270   | 89  |              |                                  |                                          |                    |       |       |       |     |

a. CDS names are from NCBI GenBank EU818711 file, pBUN24 names are from Fig 1 in **Shkoporov AN, et al.** 2013. Analysis of a novel 8.9kb cryptic plasmid from *Bacteroides uniformis*, its long-term stability and spread within human microbiota. *Plasmid*. **69(2)**:146-59. Yellow highlighted genes are those unique between each of the two plasmids

**Supplementary Table 2.** Primers used in this study

|                                                                                                       |                                                                                        |                                                                                                                                                                     |
|-------------------------------------------------------------------------------------------------------|----------------------------------------------------------------------------------------|---------------------------------------------------------------------------------------------------------------------------------------------------------------------|
| Construction of PvCL04 and PdCL02 $\Delta bcpT$                                                       | left flank forward<br>left flank reverse<br>right flank forward<br>right flank reverse | caagggatccataagaaaaaggcacatcgagaac<br>gtcgacgcgctttgttacatgaacacaaaatagctg<br>atgtacgcgctttgttgtaagccagaaattgta<br>cgaaaggatccaagatcttctcctatatcgcaagc              |
| Clone <i>bcpT</i> into pFD340                                                                         | forward<br>reverse                                                                     | accaggatccaaacacggtataacaaaagaacca<br>aggaggatccactccttcctatcttggtttagga                                                                                            |
| Screening for <i>bcpT</i> in unsequenced strains                                                      | forward<br>reverse                                                                     | ggtatatactatggagtgc<br>actccttcctatcttggtttagga                                                                                                                     |
| Outward primers for circular plasmid confirmation                                                     | left junction primer<br>right junction primer                                          | gtggatattgttttccaacatga<br>aagataaagcgtatggaagcaag                                                                                                                  |
| Construction of His-BcpT for expression in <i>E. coli</i>                                             | forward<br>reverse                                                                     | acatcatatgaacaatgaacttctattgaaaatgtaca<br>aggaggatccactccttcctatcttggtttagga                                                                                        |
| His-BcpT (R65N)                                                                                       | forward<br>reverse                                                                     | gataatcctatcttaacaaacgcaagttcatcttttg<br>caaaagatgaacttgcgctttgttaaaataggattatc                                                                                     |
| His-BcpT (R199N)                                                                                      | forward<br>reverse                                                                     | gggactgaaactctcacaactccgcaagcgtaggaggt<br>acctccatcgcttgcggagttgtgagagtttcagtccc                                                                                    |
| Amplify native and site mutants of <i>bcpT</i> from His-constructs                                    | forward<br>reverse                                                                     | gtgttcattgtaacaatgaacttctattgaaaat<br>attcgagctcggtagccgggactccttcctatcttggtttag                                                                                    |
| Amplify rbs and signal sequence of <i>bcpT</i> for construction of <i>bcpT</i> site mutants in pFD340 | forward<br>reverse                                                                     | aatcagaattgactctagagcacggtataacaaaagaacc<br>gttcattgttacatgaacacaaaatagctg                                                                                          |
| Construction of PdCL02 $\Delta dpn1$ (HMPREF1064_01439)<br>BamHI digested pLGB13                      | left flank forward<br>left flank reverse<br>right flank forward<br>right flank reverse | taagattagcattatgagtggcatctaagatagctgac<br>ctttataccagccacataactaataacagaaaaac<br>agtatgtggctggtataaagataactaatacacattagag<br>cgaattcctgcagcccgggggctaactcagatgctcgc |
| Construction of PdCL02 $\Delta dpn2$ (HMPREF1064_00451)<br>BamHI digested pLGB13                      | left flank forward<br>left flank reverse<br>right flank forward<br>right flank reverse | taagattagcattatgagtgggtaggctcgtgaaacaag<br>cagcccatccataagaaaaggatcactcttcc<br>tttcttatgggatgggctgaaacggaatc<br>cgaattcctgcagcccggggaagcaatgatggctcttctatc          |
| Complement PdCL02 $\Delta dpn2$ (in pFD340)                                                           | forward<br>reverse                                                                     | aatcagaattgactctagagtcaagaaaccggaagagtg<br>attcgagctcggtagccgggctggctgcatctccttc                                                                                    |
| Deletion of PvCL10 M0N98_03761-60<br>(sigma factor/antisigma factor)                                  | left flank forward<br>left flank reverse<br>right flank forward<br>right flank reverse | cggtgtaagattagcattatgagtgtccgcttcatggagactc<br>agcaatgacacggtgagcttgcacgtacaaac<br>acgtgcaagctcacggtgctattgctccttc<br>gatatcgaattcctgcagcccgggggttccgcggtcactcatc   |
| Clone M0N98_03761 into pFD340                                                                         | forward<br>reverse                                                                     | ttctggatcccggtatgcagtatcttggcagtcctt<br>ctacggatccggttccgaatagccctccatc                                                                                             |
| Clone M0N98_03760 into pFD340                                                                         | forward<br>reverse                                                                     | gatgggatccctacagagccaaaacctattgatg<br>tcatggatccattttatataagaacagtgaaaaagttcat                                                                                      |
| Clone M0N98_03761-60 into pFD340                                                                      | forward<br>reverse                                                                     | ttctggatcccggtatgcagtatcttggcagtcctt<br>tcatggatccattttatataagaacagtgaaaaagttcat                                                                                    |
| Construction of Pv8482 O-ag deletion mutant<br>Bvu_1068-69 cloned into PstI site pLGB13               | left flank forward<br>left flank reverse<br>right flank forward<br>right flank reverse | agtggatccccgggctgcacaaaataggccagcttatatc<br>tctttatgattacctccagtagccggatattc<br>actggaggtaatcataaagaaatggatggaagtgatc<br>cttgatatogaattcctgcagtggtgatccggagctg      |
| Construction of His-BSAP-3 for expression in <i>E. coli</i>                                           | forward<br>reverse                                                                     | taaaatatgtgtacaataacttatgacgtttgtgaaat<br>ccaccatatgttatggataaacatatcctaaaaataccacc                                                                                 |
| Construction of PvCL04 <i>ermG</i> deletion mutant<br>into BamHI site pLGB30                          | left flank forward<br>left flank reverse<br>right flank forward<br>right flank reverse | taagattagcattatgagtgcgtaggcaaaaaacggcatag<br>ctttgaactacattagtaacttcttacaggtgaatc<br>gttactaatgtagttcaaaagtcgggtgg<br>cgaattcctgcagcccggggcgacacgggtatttgggatag     |

**Construction of pBCPT-*tetQ***PCR amplify BcCL03T12C61 *tetQ*

|         |                                   |
|---------|-----------------------------------|
| forward | ttcgtcgcattcttgccagttgaacctac     |
| reverse | aattctgttcccgtattgccttatagaaatttc |

PCR amplify BF638R\_1994 transcriptional stop

|         |                                |
|---------|--------------------------------|
| forward | ggcaatacgggaacagaaattggccgaag  |
| reverse | actgccgagcccaccaattccatattcaag |

PCR amplify pBCPT flanks for *tetQ* integration

|                     |                                         |
|---------------------|-----------------------------------------|
| left flank forward  | taagattagcattatgagtggtcgaaactataacgggc  |
| left flank reverse  | aactggcaagaatcgacgaacaccctcc            |
| right flank forward | gaattggtgggctcggcagtcgaaagaac           |
| right flank reverse | cgaaattcctgcagcccgggggtgacctcccttgcgctc |

**Insertion of *ermG* in *B. fragilis* 638RΔT6SS**PCR amplify *ermG* from pNBU2-*ermG*

|         |                                     |
|---------|-------------------------------------|
| forward | tcttctaaccgcttgacggaaatcaaaaattttag |
| reverse | ttgcactacgcagtttgatttctcaggactttac  |

PCR amplify flanking regions to insert *ermG*

|                     |                                         |
|---------------------|-----------------------------------------|
| left flank forward  | gctcaacaattgcttgacgggtggagctgatgcgcttc  |
| left flank reverse  | tccgtcaagcggtagaagaattgtggaagtc         |
| right flank forward | aatcaaaactgcgtagtgcaaatatagcg           |
| right flank reverse | tgctgttctatttccgaaccgatgtagccattatcgatg |

amplify pLGB36 removing plasmid *ermG*

|         |                     |
|---------|---------------------|
| forward | gttcggaaatagaacagg  |
| reverse | ccgtcaagcaattggtgag |

Detect pBCPT in transconjugants

|         |                                                |
|---------|------------------------------------------------|
| forward | aatcagaattgactctagagcgtccttccttcacttattg       |
| reverse | atcgcagctcggtagccgggcatggtgatgatgctatttaagatag |

forward multiplex primer (for all three species)

MPI forward gtagacacccgcccgt

multiplex *P. vulgatus* reverse

ctttctctcttcggtatcattac

Multiplex *B. fragilis* reverse

MPI-Bf reverse gctaatacccccaatcatac

multiplex *B. ovatus* reverse

MPI-Bo reverse atcaatattgcgtactcgaac

Clone PvCL04 CS034\_04056 into pFD340

|         |                                              |
|---------|----------------------------------------------|
| forward | aatcagaattgactctagagcgtgagttgtaatacaacctattg |
| reverse | atcgcagctcggtagccgggtagttaggtgcatcac         |

Clone PvCL04 CS034\_04057 into pFD340

|         |                                                     |
|---------|-----------------------------------------------------|
| forward | aatcagaattgactctagaggtctaactttgcaacgcttc            |
| reverse | atcgcagctcggtagccgggttaaataatgaatatccaaaactaataaagg |

Clone PvCL04 CS034\_04059 into pFD340

|         |                                                |
|---------|------------------------------------------------|
| forward | aatcagaattgactctagagcgtccttccttcacttattg       |
| reverse | atcgcagctcggtagccgggcatggtgatgatgctatttaagatag |

**Restriction sites are underlined**

| Supplementary Table 3. Strains used in this study                                       | source                                 | toxin phenotype of wild type Pv and Pd strains |
|-----------------------------------------------------------------------------------------|----------------------------------------|------------------------------------------------|
| <i>Phocaeicola dorei</i> CL02T00C15                                                     | Comstock lab (Zitomersky, 2011)        | BcpT                                           |
| <i>Phocaeicola dorei</i> CL02T00C15 $\Delta bcpT$ ( $\Delta$ HMPREF1063_05166 )         | this study                             |                                                |
| <i>Phocaeicola dorei</i> CL02T00C15 $\Delta bcpT$ <i>pbcpT</i>                          | this study                             |                                                |
| <i>Phocaeicola dorei</i> CL02T00C15 $\Delta bcpT$ <i>pbcpT</i> R65N                     | this study                             |                                                |
| <i>Phocaeicola dorei</i> CL02T00C15 $\Delta bcpT$ <i>pbcpT</i> R199N                    | this study                             |                                                |
| <i>Phocaeicola dorei</i> CL02T00C15 $\Delta bcpT$ <i>pbcpT</i> R65N R199N               | this study                             |                                                |
| <i>Phocaeicola vulgatus</i> CL04T12C01                                                  | Comstock lab (Zitomersky, 2011)        | BcpT                                           |
| <i>Phocaeicola vulgatus</i> CL04T12C01 tn10                                             | this study                             |                                                |
| <i>Phocaeicola vulgatus</i> CL04T12C01 tn12                                             | this study                             |                                                |
| <i>Phocaeicola vulgatus</i> CL04T12C01 $\Delta bcpT$ ( $\Delta$ CS034_04058)            | this study                             |                                                |
| <i>Phocaeicola vulgatus</i> CL04T12C01 $\Delta bcpT$ <i>pbcpT</i>                       | this study                             |                                                |
| <i>Phocaeicola vulgatus</i> CL04T12C01 $\Delta$ ermG pBCPT-tetQ-ttr                     | this study                             |                                                |
| <i>Phocaeicola dorei</i> CL03T12C01                                                     | Comstock lab (Zitomersky, 2011)        | BSAP-3                                         |
| <i>Phocaeicola dorei</i> 9_1_42 FAA                                                     | BEI                                    | BSAP-3                                         |
| <i>Phocaeicola dorei</i> 5_1_36/D4                                                      | BEI                                    |                                                |
| <i>Phocaeicola dorei</i> CL01T00C33                                                     | Comstock lab (Zitomersky, 2011)        |                                                |
| <i>Phocaeicola dorei</i> CL08T03C21                                                     | Comstock lab (Zitomersky, 2011)        |                                                |
| <i>Phocaeicola dorei</i> CL12T00C02                                                     | Comstock lab (Zitomersky, 2011)        |                                                |
| <i>Phocaeicola dorei</i> CL15T00C36                                                     | Comstock lab (Zitomersky, 2011)        |                                                |
| <i>Phocaeicola vulgatus</i> ATCC 8482                                                   | ATCC                                   |                                                |
| <i>Phocaeicola vulgatus</i> ATCC 8482 $\Delta$ Bvu_1068-69 (O-ag mutant)                | this study                             |                                                |
| <i>Phocaeicola vulgatus</i> CL05T12C02                                                  | Comstock lab (Zitomersky, 2011)        | BcpT                                           |
| <i>Phocaeicola vulgatus</i> CL06T12C01                                                  | Comstock lab (Zitomersky, 2011)        |                                                |
| <i>Phocaeicola vulgatus</i> CL07T06C01                                                  | Comstock lab (Zitomersky, 2011)        |                                                |
| <i>Phocaeicola vulgatus</i> CL09T03C04                                                  | Comstock lab (Zitomersky, 2011)        | BSAP-3                                         |
| <i>Phocaeicola vulgatus</i> CL10T00C06                                                  | Comstock lab (Zitomersky, 2011)        |                                                |
| <i>Phocaeicola vulgatus</i> CL10T00C06 $\Delta$ CK234_00400 - 401 (O-ag mutant)         | Comstock lab (Laclare McEneaney, 2018) |                                                |
| <i>Phocaeicola vulgatus</i> CL10T00C06 $\Delta$ CK234_00923-924 ( $\Delta$ sig/antisig) | this study                             |                                                |
| <i>Phocaeicola vulgatus</i> CL10T00C06 $\Delta$ CK234_00923-924 p00923                  | this study                             |                                                |
| <i>Phocaeicola vulgatus</i> CL10T00C06 $\Delta$ CK234_00923-924 p00924                  | this study                             |                                                |
| <i>Phocaeicola vulgatus</i> CL10T00C06 pBCPT gene (CS034_04056)                         | this study                             |                                                |
| <i>Phocaeicola vulgatus</i> CL10T00C06 pBCPT gene (CS034_04057)                         | this study                             |                                                |
| <i>Phocaeicola vulgatus</i> CL10T00C06 pBCPT gene (CS034_04059)                         | this study                             |                                                |
| <i>Phocaeicola vulgatus</i> CL11T12C09                                                  | Comstock lab (Zitomersky, 2011)        |                                                |
| <i>Phocaeicola vulgatus</i> CL13T00C01                                                  | Comstock lab (Zitomersky, 2011)        |                                                |
| <i>Phocaeicola vulgatus</i> CL14T03C19                                                  | Comstock lab (Zitomersky, 2011)        | bacteroidetocin A, BcpT                        |
| <i>Bacteroides thetaiotamicron</i> VPI 5482                                             | lab stock                              |                                                |
| <i>Bacteroides thetaiotamicron</i> VPI 5482 pFD340                                      | Comstock lab (Laclare McEneaney, 2018) |                                                |
| <i>Bacteroides thetaiotamicron</i> VPI 5482 <i>pbcpT</i>                                | this study                             |                                                |
| <i>Bacteroides ovatus</i> D2                                                            | BEI                                    |                                                |
| <i>Bacteroides ovatus</i> D2 pBCPT-tetQ-ttr                                             | this study                             |                                                |
| <i>Phocaeicola dorei</i> CL02T12C06                                                     | Comstock lab (Zitomersky, 2011)        | BcpT                                           |
| <i>Phocaeicola dorei</i> CL02T12C06 $\Delta$ dpn1                                       | this study                             |                                                |
| <i>Phocaeicola dorei</i> CL02T12C06 $\Delta$ dpn2                                       | this study                             |                                                |
| <i>Phocaeicola dorei</i> CL02T12C06 $\Delta$ dpn1 $\Delta$ dpn2                         | this study                             |                                                |
| <i>Bacteroides fragilis</i> 638R                                                        | lab stock                              |                                                |
| <i>Bacteroides fragilis</i> 638RAT6SSermG                                               | this study                             |                                                |
| <i>Bacteroides fragilis</i> 638RAT6SSermG pBCPT-tetQ-ttr                                | this study                             |                                                |
| <i>Bacteroides ovatus</i> ATCC 8483                                                     | ATCC                                   |                                                |
| <i>Bacteroides uniformis</i> ATCC 8492                                                  | ATCC                                   |                                                |
| <i>Bacteroides finegoldii</i> CL09T03C10                                                | Comstock lab (Zitomersky, 2011)        |                                                |
| <i>Parabacteroides merdae</i> CL03T12C32                                                | Comstock lab (Zitomersky, 2011)        |                                                |
| <i>Parabacteroides johnsonii</i> CL02T12C29                                             | Comstock lab (Zitomersky, 2011)        |                                                |
| <i>Parabacteroides goldsteinii</i> CL02T12C30                                           | Comstock lab (Zitomersky, 2011)        |                                                |
| <i>E. coli</i> DH5 $\alpha$                                                             | lab collection                         |                                                |
| <i>E. coli</i> BL21/DE3                                                                 | lab collection                         |                                                |
| <i>E. coli</i> S17 $\lambda$ pir                                                        | E. Martens                             |                                                |
| <i>E. coli</i> HB101                                                                    | lab collection                         |                                                |
| <i>E. coli</i> HS                                                                       | lab collection                         |                                                |
| <i>E. coli</i> BL21/DE3 pHis-bcpT                                                       | this study                             |                                                |
| <i>E. coli</i> BL21/DE3 pHis-bcpT R65N                                                  | this study                             |                                                |

|                                                      |            |  |
|------------------------------------------------------|------------|--|
| <i>E. coli</i> BL21/DE3 pHis- <i>bcpT</i> R199N      | this study |  |
| <i>E. coli</i> BL21/DE3 pHis- <i>bcpT</i> R65N R199N | this study |  |
| <i>E. coli</i> BL21/DE3 pHis- <i>dpn1</i>            | this study |  |
| <i>E. coli</i> BL21/DE3 pHis- <i>dpn2</i>            | this study |  |
| <i>Salmonella enterica</i> ATCC 14028                | ATCC       |  |

Zitomersky NL, Coyne MJ, Comstock LE. Longitudinal analysis of the prevalence, maintenance, and IgA response to species of the order Bacteroidales in the human gut. *Infect Immun*. 2011 May;79(5):2012-20. doi: 10.1128/IAI.01348-10. Epub 2011 Mar 14. PMID: 21402766; PMCID: PMC3088145.

McEneaney VL, Coyne MJ, Chatzidaki-Livanis M, Comstock LE. Acquisition of MACPF domain-encoding genes is the main contributor to LPS glycan diversity in gut Bacteroides species. *ISME J*. 2018 Dec;12(12):2919-2928. doi: 10.1038/s41396-018-0244-4. Epub 2018 Jul 31. PMID: 30065309; PMCID: PMC6246601.

Roelofs KG, Coyne MJ, Gentyala RR, Chatzidaki-Livanis M, Comstock LE. Bacteroidales Secreted Antimicrobial Proteins Target Surface Molecules Necessary for Gut Colonization and Mediate Competition In Vivo. *mBio*. 2016 Aug 23;7(4):e01055-16. doi: 10.1128/mBio.01055-16. PMID: 27555309; PMCID: PMC4999547.

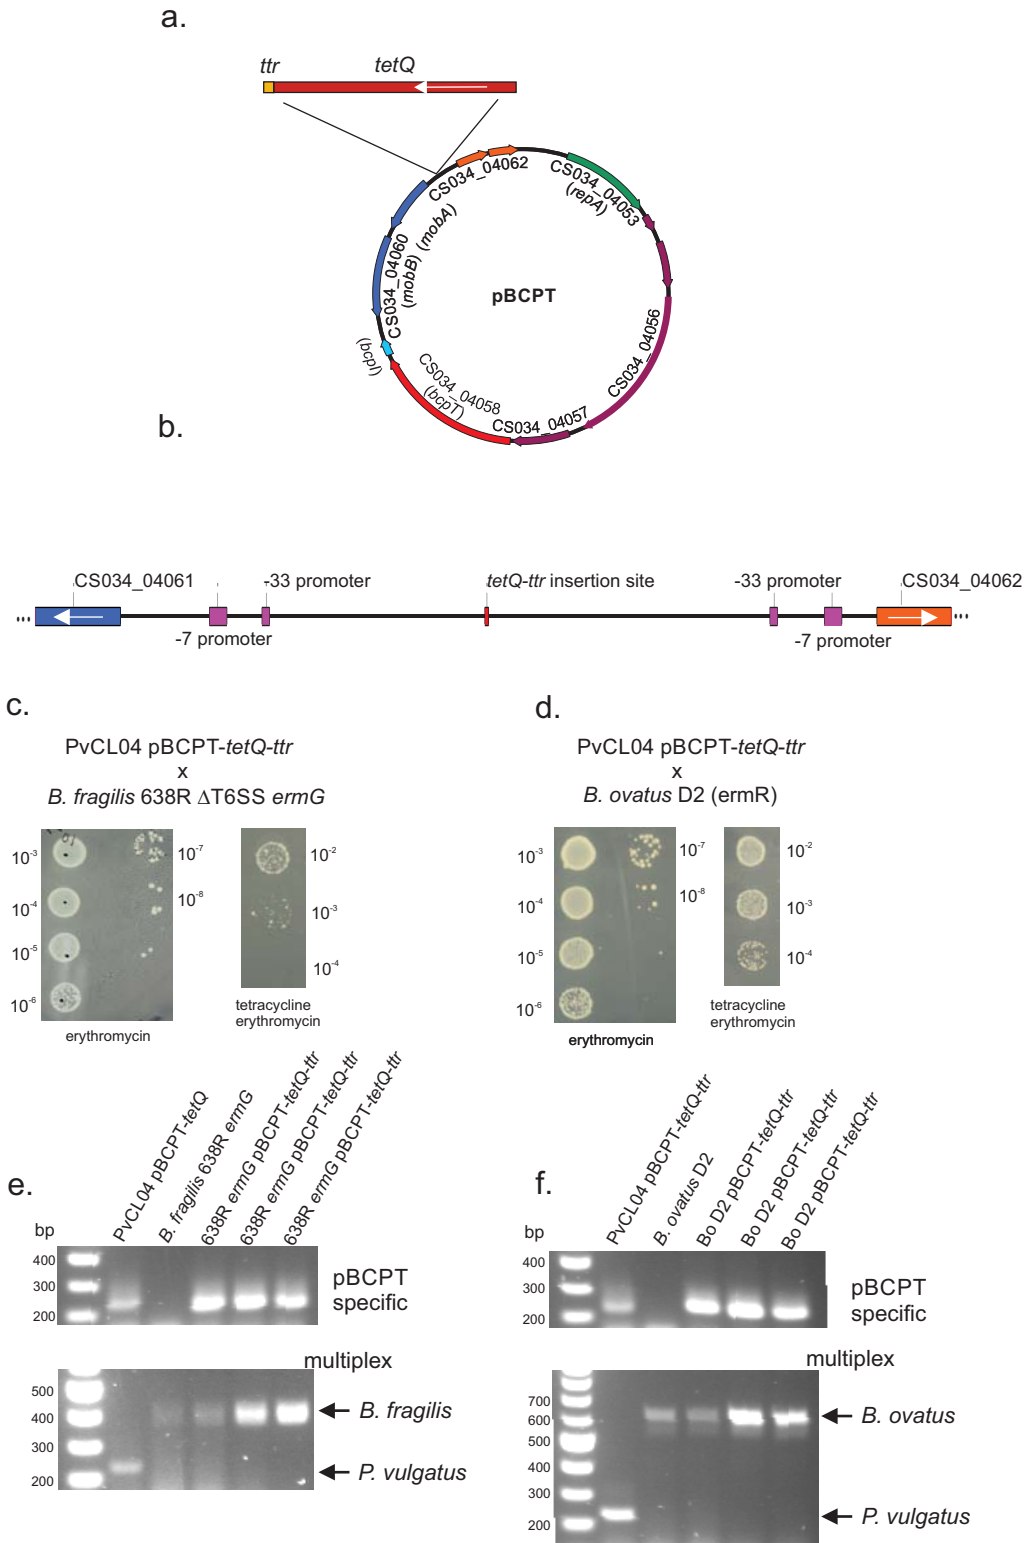

**Supplementary Figure 1. Analysis of pBCPT plasmid mobilization.** **a.** Plasmid map of pBCPT with gene names from PvCL04. The insertion site of *tetQ* and the transcriptional termination region (*ttr*) is shown. **b.** Amplified intergenic region between CS034\_04061 and CS034\_04062 showing that the insertion does not affect the promoters of either divergently transcribed gene. **c. d.** Plates showing the colonies arising on erythromycin plates (recipient strain) and tetracycline/erythromycin plates (transconjugants) for transfer of the pBCPT-*tetQ* plasmid from PvCL04 to *B. fragilis* 638R $\Delta$ T6SS *ermG* (C) and *B. ovatus* D2 (D). **e. f.** Amplicons resulting from PCR with primers specific to the *bcpT* gene (top) and a multiplex of the 16S rRNA gene (bottom) of the transconjugants.

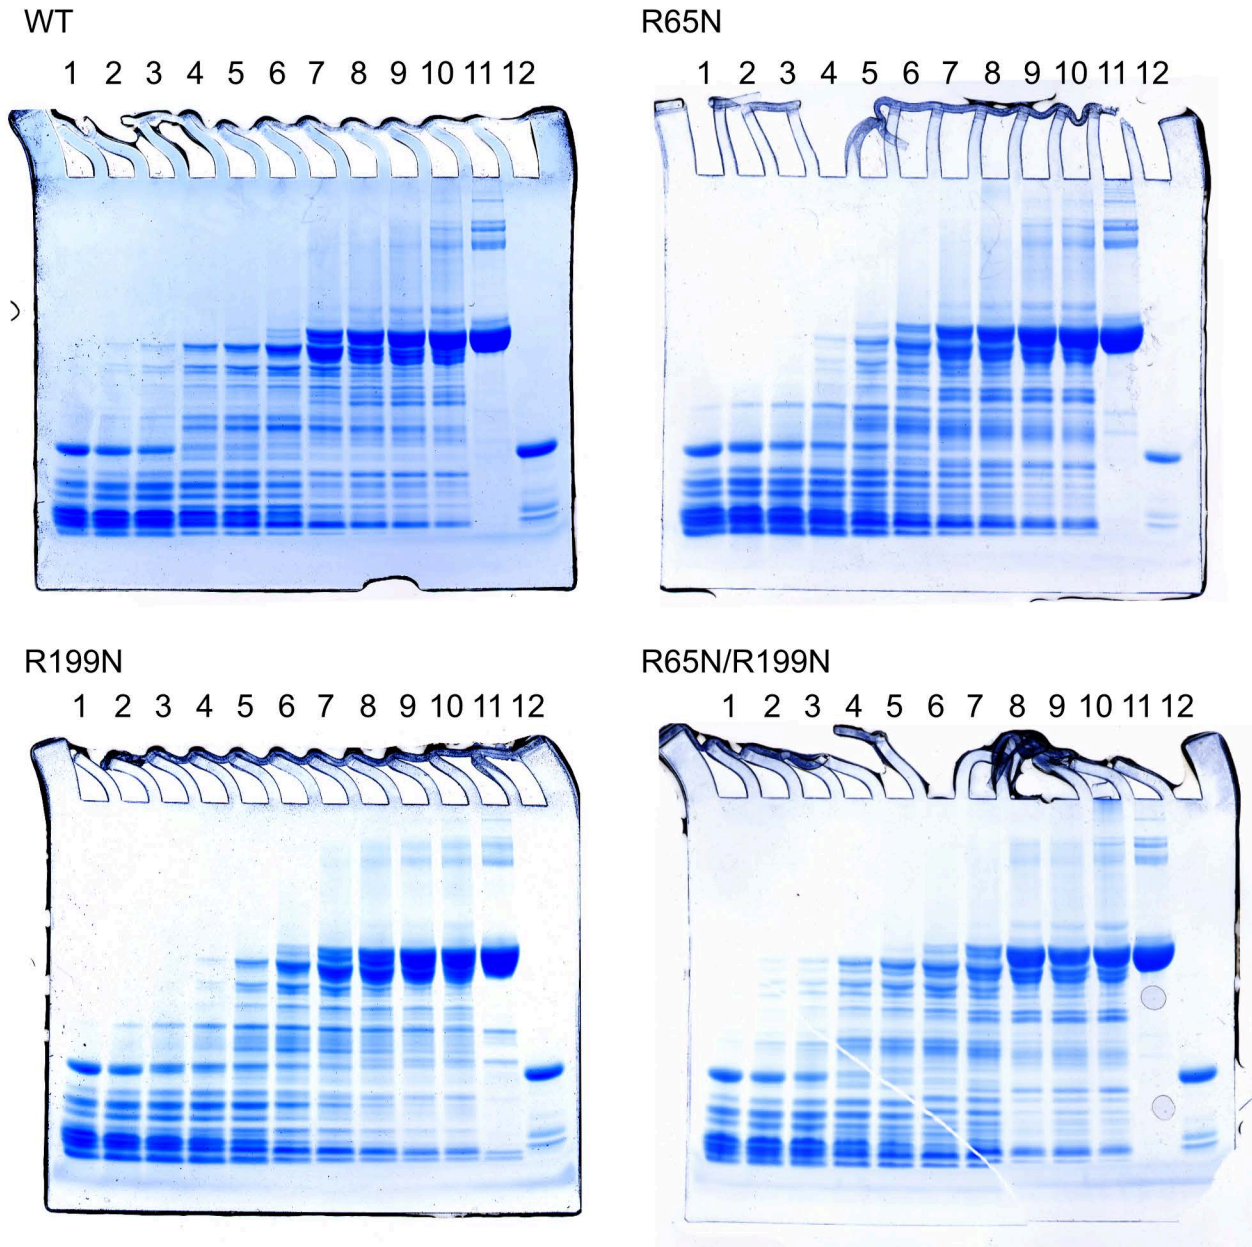

**Figure S2. Trypsin digestion of BcpT cleavage site mutants.** Purified recombinant wt BcpT and its cleavage site mutants, R65N, R199N and R65N-R199N, were cleaved (5 $\mu$ g in each reaction) with chymotrypsin. Two-fold dilutions of chymotrypsin starting with 2.5  $\mu$ g of chymotrypsin were generated in HBS and to each dilution 5 $\mu$ g of BcpT was added (final reaction volume of 20 $\mu$ l) and incubated for 30 min at 37 $^{\circ}$ C. The digestion reactions were stopped by the addition of 5 $\mu$ l of SDS-PAGE sample buffer and heating to 95 $^{\circ}$ C for 5 min. The cleavage products were separated on an 8-16% SDS-PAGE: the cleavage products are shown in lanes 1-10. Lane 11 contains uncleaved WT BcpT or its derivatives. Lane 12 contains 2.5  $\mu$ g of chymotrypsin.

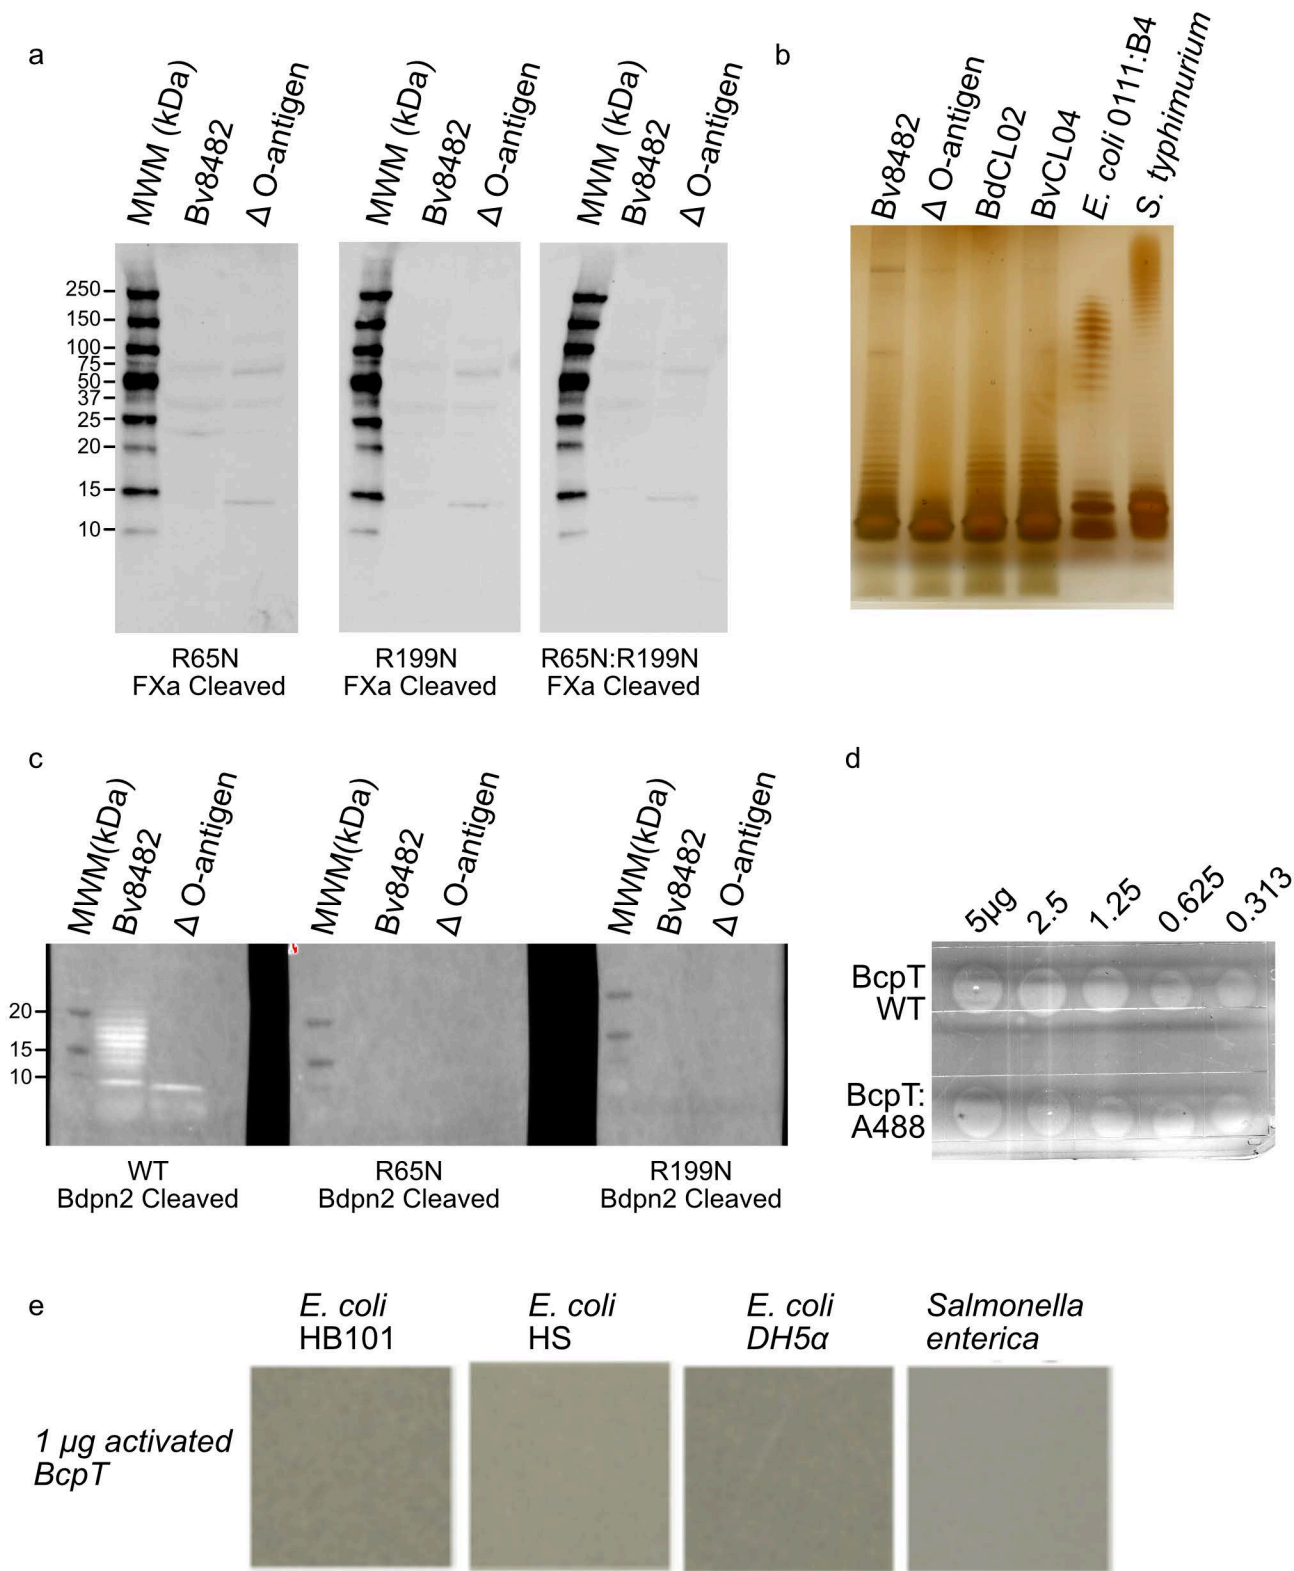

**Figure S3. Analysis of BcpT and BcpT site mutants binding to components of membrane fraction and LPS of indicated strains on Western blots.**

**a.** Receptor blot of membranes from Bv8482 or its O-antigen mutant probed with BcpT site mutants (see Methods for receptor blot details). **b.** Silver-stain analysis of LPS extracts from indicated strains. **c.** Probing of blots containing purified LPS with Alexa-488-labeled BcpT. **d.** Spot tests of the activated WT BcpT and the Alexa-fluor labeled WT BcpT use to probe the lipid blots in panel e and in Fig. 5. **e.** Spot tests of activated BcpT (5μg) on the strains of *E. coli* and *Salmonella enterica*.



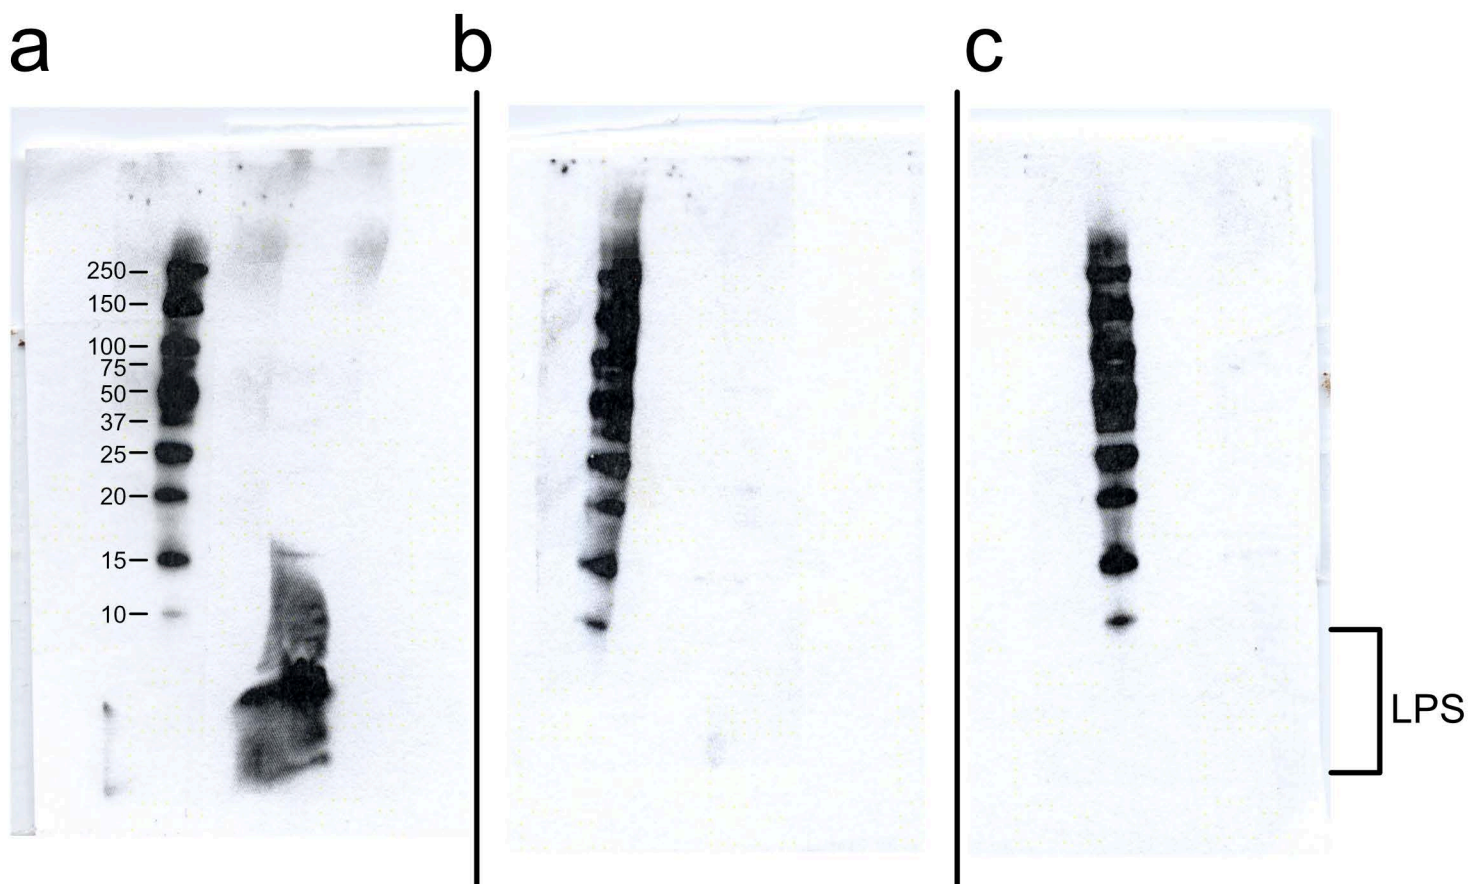

**Figure S4. Amino terminal fragments of BcpT block BcpT binding to membrane LPS. a.** Receptor blot of Bv8482 membranes probed with FXa-cleaved BcpT ( $1.5\mu\text{g}/\text{ml}$ ) (see Methods for details). **b.** Receptor blot of Bv8482 membranes probed with FXa-cleaved BcpT in the presence of 20-fold molar excess N-terminal BcpT fragment 18-199. **c.** Receptor blot of Bv8482 membranes probed with FXa-cleaved BcpT in the presence of 20-fold molar excess N-terminal BcpT fragment 66-199.

### Supplemental references

1) Shkoporov, A. N. *et al.* Analysis of a novel 8.9kb cryptic plasmid from *Bacteroides uniformis*, its long-term stability and spread within human microbiota. *Plasmid* **69**, 146-159, doi:10.1016/j.plasmid.2012.11.002 (2013).

2) Zitomersky NL, Coyne MJ, Comstock LE. Longitudinal analysis of the prevalence, maintenance, and IgA response to species of the order Bacteroidales in the human gut. *Infect Immun.* 2011 May;79(5):2012-20. doi: 10.1128/IAI.01348-10. Epub 2011 Mar 14. PMID: 21402766; PMCID: PMC3088145.

3) Laclare McEneaney, V., Coyne, M. J., Chatzidaki-Livanis, M. & Comstock, L. E. Acquisition of MACPF domain-encoding genes is the main contributor to LPS glycan diversity in gut *Bacteroides* species. *ISME J* **12**, 2919-2928, doi:10.1038/s41396-018-0244-4 (2018).

4) Roelofs, K. G., Coyne, M. J., Gentyala, R. R., Chatzidaki-Livanis, M. & Comstock, L. E. Bacteroidales Secreted Antimicrobial Proteins Target Surface Molecules Necessary for Gut Colonization and Mediate Competition In Vivo. *mBio* **7**, doi:10.1128/mBio.01055-16 (2016).
